# Supplementary material
Source: PubMed Central journal article supplement (PMC4679128)
Supplement: CJP-2015-vol60-Nov2015-475-487-eTables.pdf [file CJP-2015-vol60-Nov2015-475-487-eTables.pdf]

**Online eTable 1 Unpublished HF cost-offset studies**

| No.                                      | Study                                                                                                                                                                                                                                                                                                                                 | Population                                                                                                                 | Supported or Supportive housing                                                                                    | Number of participants<br>E =experimental<br>C=comparison | Observation period                                                       | Study design                                                                                   | Perspective                           | Measured costs                                                                                                                                                                                                                                                                                                                                                        | Main results                                                                                                           |
|------------------------------------------|---------------------------------------------------------------------------------------------------------------------------------------------------------------------------------------------------------------------------------------------------------------------------------------------------------------------------------------|----------------------------------------------------------------------------------------------------------------------------|--------------------------------------------------------------------------------------------------------------------|-----------------------------------------------------------|--------------------------------------------------------------------------|------------------------------------------------------------------------------------------------|---------------------------------------|-----------------------------------------------------------------------------------------------------------------------------------------------------------------------------------------------------------------------------------------------------------------------------------------------------------------------------------------------------------------------|------------------------------------------------------------------------------------------------------------------------|
| <b>Studies with experimental designs</b> |                                                                                                                                                                                                                                                                                                                                       |                                                                                                                            |                                                                                                                    |                                                           |                                                                          |                                                                                                |                                       |                                                                                                                                                                                                                                                                                                                                                                       |                                                                                                                        |
| 1                                        | Goering, 2014(1)<br>At Home/Chez Soi project<br>Vancouver, BC<br>Winnipeg, MA<br>Toronto, ON<br>Montreal, QC<br>Moncton NB<br><br>Note 1) Refer to published article Stergiopoulos et al., 2015 for moderate need group results.<br><br>Note 2) Site results for high need group presented in the following rows (1A, 1B, 1C, 1D, 1E) | Homeless and mentally ill with severe mental health problems (high need)<br>Recruited mostly from shelters and the streets | Supported housing (scattered-site with rent subsidies)<br>HF with Assertive Community Treatment (ACT)<br><br>E=301 | receiving treatment as usual<br>C=649                     | 3 to 6 months before, 21 or 24 months after (Stergiopoulos et al., 2015) | Randomized controlled trial<br>All data are self-reported (as in (Stergiopoulos et al., 2015)) | Societal (Stergiopoulos et al., 2015) | Health and social services: ED, hospitalization (psychiatric and physical), visits to community health centers, visits to day centers, shelters, rehabilitation centers, Justice services: Police contacts, arrests, court appearances, police cell, detention centers, prison<br>Welfare and disability payments<br>Employment earnings (Stergiopoulos et al., 2015) | Cost savings for non-HF intervention = \$21,375<br>HF/ACT cost: 22 257\$<br>HF net cost = 882\$                        |
| 1A                                       | Currie et al., 2014 (2)<br><br>Vancouver                                                                                                                                                                                                                                                                                              | Same as above                                                                                                              | Same as above<br>E=90 receiving supported housing (scattered site)                                                 | Receiving treatment as usual<br>C=100                     | Same as above                                                            | Same as above                                                                                  | Same as above                         | Same as above                                                                                                                                                                                                                                                                                                                                                         | Cost reduction for non-HF intervention = \$24,190<br>HF/ACT cost: \$ 28,282<br>HF net cost = \$4092                    |
| 1B                                       | Distasio et al., 2014 (3)<br><br>Winnipeg                                                                                                                                                                                                                                                                                             | Same as above<br>68% aboriginal                                                                                            | Supported housing<br>E=100                                                                                         | Same as above<br>C=100                                    | Same as above                                                            | Same as above                                                                                  | Same as above                         | Same as above                                                                                                                                                                                                                                                                                                                                                         | High need group<br>Cost reduction for non-HF intervention: 17 527\$<br>HF/ACT cost : 18, 840\$<br>HF net cost = \$1313 |
| 1C                                       | Stergiopoulos et al., 2014 (4)<br><br>Toronto                                                                                                                                                                                                                                                                                         | Same as above                                                                                                              | Same as above<br>E = 97                                                                                            | Same as above<br>C=100                                    |                                                                          | Same as above                                                                                  | Same as above                         | Same as above                                                                                                                                                                                                                                                                                                                                                         | Cost reduction for non-HF intervention = 31 747\$<br>HF cost (ACT) = 21 089\$<br>HF net cost = \$10,658                |
| 1D                                       | Latimer et al., (5)<br><br>Montreal                                                                                                                                                                                                                                                                                                   | Same as above                                                                                                              | Same as above<br>E=81                                                                                              | Same as above<br><br>C= 82                                | Same as above                                                            | Same as above                                                                                  | Same as above                         | Same as above                                                                                                                                                                                                                                                                                                                                                         | E-total cost=\$64 655<br>C-total cost= \$67 652<br><br>Cost reduction for non-HF                                       |

|    |                                       |                                                                                         |                                      |                                      |               |               |               |               |                                                                                                                    |
|----|---------------------------------------|-----------------------------------------------------------------------------------------|--------------------------------------|--------------------------------------|---------------|---------------|---------------|---------------|--------------------------------------------------------------------------------------------------------------------|
|    |                                       |                                                                                         |                                      |                                      |               |               |               |               | <i>intervention = \$25,479</i><br><i>HF intervention cost = \$22,482</i><br><i>HF net cost = 2997\$</i>            |
| 1E | Aubry et al., 2014 (6)<br><br>Moncton | Same as above but including some moderate-need participants and some rural homelessness | Same as above<br>E=100<br>(24 rural) | Same as above<br>C=101<br>(19 rural) | Same as above | Same as above | Same as above | Same as above | <i>Cost reduction for non-HF intervention = \$16,089</i><br><i>Cost of HF= \$20,771</i><br><i>Net cost= \$4682</i> |

**Studies with quasi-experimental designs involving a comparison group**

|   |                                                                                                                           |                                                                                                                                                                                       |                                                                                                                         |                                                                   |         |                                                                                                                                                                           |                                                                                     |                                                                                         |                                                                                                                                                                                                                                                                                                                                                    |
|---|---------------------------------------------------------------------------------------------------------------------------|---------------------------------------------------------------------------------------------------------------------------------------------------------------------------------------|-------------------------------------------------------------------------------------------------------------------------|-------------------------------------------------------------------|---------|---------------------------------------------------------------------------------------------------------------------------------------------------------------------------|-------------------------------------------------------------------------------------|-----------------------------------------------------------------------------------------|----------------------------------------------------------------------------------------------------------------------------------------------------------------------------------------------------------------------------------------------------------------------------------------------------------------------------------------------------|
| 2 | Krisiloff & Boyce, 2012 (7)<br>Project 50<br>Skid Row, LA                                                                 | Homeless<br>Top 50 highest hospital service users                                                                                                                                     | Supportive housing with multi-disciplinary Team providing intrgrated health, mental health and substance abuse services | E=50<br>C=46<br>receiving treatment as usual                      | 5 years | Comparison group with similar age and gender distribution, as well as similar histories of county departmental service use but on average had a lower vulnerability score | Government                                                                          | Alcohol and drug, incarceration, medical, mental health                                 | Over a two-year study period, Project 50 yielded total cost offsets of 3,284 M\$, which is 108% of the money the program actually spent (3.045M\$) in providing its participants with permanent housing and supportive services. (Surplus of \$4774 per occupied unit over a two year period)                                                      |
| 3 | Levanon Seligson et al., 2013(8)<br><br>New York City<br><br>(Population A only)                                          | Chronically homeless single adults with SMI or who are dually diagnosed with a mental illness and a substance use disorder – those least likely to be placed excluded from comparison | Supportive and supported housing                                                                                        | E = 431<br>C = 1,366<br>homeless receiving treatment as usual     | 1 year  | Propensity score matching to compare placed and unplaced individuals<br>Administrative data                                                                               | Not stated<br>Government -subsidized health care, social services and jail services | Total Medicaid, state psychiatric centers, shelters, food stamps, cash assistance, jail | After adjustment, total measured costs are \$38,592 per person per year on average for controls, \$38,714 for placed individuals, thus lower by \$878. Intervention cost is \$15,064. All costs are lower in placed group, except for cash assistance and food stamps. Largest difference is shelters, \$10,332 vs \$416, or \$9,916 less (p<0.05) |
| 4 | Becker, 2015(9)<br><br>Anchorage, AK<br><br>United States<br><br>Aubry et al, Forthcoming(10)<br><br>Five Canadian cities | Homeless with mental health and addiction problems                                                                                                                                    | Supportive housing                                                                                                      | E=29<br>C=12<br>homeless receiving treatment as usual (wait-list) | 3 years | 3 year follow-up post entry into HF program<br>Administrative data                                                                                                        | Health insurer                                                                      | Hospital cost (ED, inpatient, outpatient)                                               | E1=\$27,217<br>E2=\$29,360<br>E3=\$60,912<br><br>C1=\$24,919<br>C2=\$39,121<br>C3=\$60,309                                                                                                                                                                                                                                                         |

**Studies with pre-post designs, no comparison group**

|   |                                                                                                                             |                                       |                                                                       |                                        |                                                |                                 |               |                                                                                                                                                            |                                                                                                                                                                                                                                                                                                                                                |
|---|-----------------------------------------------------------------------------------------------------------------------------|---------------------------------------|-----------------------------------------------------------------------|----------------------------------------|------------------------------------------------|---------------------------------|---------------|------------------------------------------------------------------------------------------------------------------------------------------------------------|------------------------------------------------------------------------------------------------------------------------------------------------------------------------------------------------------------------------------------------------------------------------------------------------------------------------------------------------|
| 5 | Mondello, Gass, McLaughlin, & Shore, 2007(11)<br><br>Mondello et al., 2009<br><br>Greater Portland, ME<br><br>United States | Urban homeless (24% chronic homeless) | Supported (mostly scattered site with voucher) and supportive housing | 2007 study E=99<br><br>2009 study E=97 | 1 year before<br>1 year after<br>2 years after | Pre-post<br>Administrative data | Not stated    | Healthcare, mental healthcare, ED, jail, ambulance, police                                                                                                 | 2007 study<br><br>Pre-HF E=\$28,045<br>Post-HF E= \$27,101<br><br>Cost decrease of \$14,036, offsetting intervention cost of \$13,092<br><br>Net cost offset =-\$944<br><br>2009 study<br><br>Pre-HF E=\$26,986<br>Post-HF E=\$26,851<br><br>Cost decrease of \$13,492, offsetting intervention cost of \$13,359<br><br>Net cost of HF = \$133 |
| 6 | Mondello et al., 2009 (12)                                                                                                  | Rural homeless                        | Supported (mostly scattered site with voucher) and supportive housing | E=155                                  | Same as above                                  | Same as above                   | Same as above | Same as above                                                                                                                                              | Pre-HF E=\$18,949<br>Post-HF E=\$16,198<br>Cost decrease of \$7260 offsetting intervention cost of \$4,509<br><br>Net cost savings of HF = \$2751                                                                                                                                                                                              |
| 7 | Hirsch, 2008 (13)<br>Rhode Island, NY<br>United States                                                                      | Chronic Homeless HF program clients   | Supported (scattered and congregate)                                  | E=48                                   | 1 year before,<br>1 year after                 | Pre-post                        | Government    | Hospital, mental health overnight, alcohol/drug overnight, ED, jail/prison, shelter                                                                        | Average cost per client pre-HF: 31 617\$<br>Average cost per client post-HF: 23,671\$<br>Cost savings = 7946\$ per client                                                                                                                                                                                                                      |
| 8 | United Way of Greater Los Angeles, 2009 (14)<br><br>Los Angeles<br><br>United States                                        | Chronic homeless                      | Case management                                                       | E=4                                    | 2 years before,<br>2 years after               | Pre-post                        | Government    | Inpatient treatment / detox admission; alcohol & drug outpatient treatment/detox; ED, hospitalization, mental health clinic, arrest, jail, prison, arrests | Pre-HF total E=187,288\$<br>Post-HF E= 107,032\$<br><br>Cost savings of 80,256\$ (43%) over two years                                                                                                                                                                                                                                          |

|    |                                                                                             |                                                                                                                  |                                                                               |               |                                         |                                                                                                                   |                |                                                                                                                                                                                                                                             |                                                                                                           |
|----|---------------------------------------------------------------------------------------------|------------------------------------------------------------------------------------------------------------------|-------------------------------------------------------------------------------|---------------|-----------------------------------------|-------------------------------------------------------------------------------------------------------------------|----------------|---------------------------------------------------------------------------------------------------------------------------------------------------------------------------------------------------------------------------------------------|-----------------------------------------------------------------------------------------------------------|
| 9  | Vaughn & Walsh, 2009 (15)<br><br>Asheville, NC<br><br>United States                         | Chronic homeless                                                                                                 | Supported housing (scattered site) supportive housing with case management    | E=25          | 4 years                                 | Pre-post<br>2 years before HF and 2 years after HF interviews                                                     | Government     | Substance abuse service, shelter, jail, ED, outpatient, HIV services, psychiatric hospital, inpatient mental health, outpatient mental health                                                                                               | Pre-HF<br>E= \$631,379<br>Post-HF<br>E= \$570,938<br><br>Cost savings of \$60,441 (9.5%).                 |
| 10 | Nogaski, Rynell, Terpstra, & Edwards, 2009 (16)<br><br>Illinois<br><br>United States        | Homeless or at risk of homelessness with mental illness and/or who are formerly incarcerated                     | Mostly supportive housing                                                     | E=177         | 2 years before, 2 years after           | Pre-post                                                                                                          | Government     | Medicaid, state prison, county jails, mental health hospitals, uncompensated hospital services paid by hospital, substance abuse treatment services                                                                                         | Cost decrease for all variables following                                                                 |
| 11 | The National Center on Family Homelessness, 2009 (17)<br><br>Minnesota<br><br>United States | Homeless with complex needs including children and families                                                      | Supported housing with case management                                        | E=518<br>C= ? | 2003 to 2008, varying follow-up periods | Pre-post<br>Difference in difference                                                                              | Government     | Income support, medical, mental health, chemical dependency, pharmacy, detox, child welfare, prison/jail                                                                                                                                    | Net cost = \$4,408                                                                                        |
| 12 | Mercer Alliance to End Homelessness, 2011 (18)<br>New Jersey<br><br>United States           | Chronic homeless                                                                                                 | Supported housing<br>Scattered site<br>Rental assistance with case management | E=15          | 1 year before, 1 year after             | Pre-post                                                                                                          | Health insurer | Hospital overnight, mental health overnight, ER, alcohol/drug overnight, jail/prison overnight, shelter overnight                                                                                                                           | Pre-HF<br>E=\$ 30,239<br>Post-HF<br>E= \$2223<br>HF cost: \$18,587<br>Savings per tenant per year: 9429\$ |
| 13 | Guerin, 2011 (19)<br><br>Albuquerque, New Mexico<br><br>United States                       | Homeless with behavioral health disorder<br>HF program clients of the Supportive Housing Coalition of New Mexico | Supported housing (scattered site) with case management                       | E=33          | More than 365 days                      | Pre-post comparison<br>One year before HF, one year after HF<br>Administrative data and self-reported (interview) | Government     | ED, inpatient medical, inpatient behavioral health, outpatient medical, outpatient behavioral health, detoxification services, ambulance services, fire department response services, ACT, jail bookings, case management, shelter, arrests | Pre-HF<br>E = 717,006\$<br>Post-HF<br>E = \$ 689,857<br><br>HF cost savings = \$27,149\$ (-3.8%)          |
| 14 | Corry, K., 2012 (20)<br>Project 25<br>San Diego<br>United States                            | Homeless heavy services users of health and justice services                                                     | Supported housing                                                             | E=25          |                                         | Pre-post<br>1 year before (2010), 1 year after (2011)                                                             | Government     | Psychiatric hospital, arrests, jail, detox/sobering centers, crisis house, PERT visits, shelter                                                                                                                                             | Pre-HF<br>E = 317,904\$<br>post-HF<br>E=: 97,437\$                                                        |

|    |                                                                                                 |                                                                                                                                               |                                                                                                                                                                               |         |                                    |                                                                                                                                               |                                                                                   |                                                                                                                                                                                            |                                                                                                                                                                                                                                                                                                                               |
|----|-------------------------------------------------------------------------------------------------|-----------------------------------------------------------------------------------------------------------------------------------------------|-------------------------------------------------------------------------------------------------------------------------------------------------------------------------------|---------|------------------------------------|-----------------------------------------------------------------------------------------------------------------------------------------------|-----------------------------------------------------------------------------------|--------------------------------------------------------------------------------------------------------------------------------------------------------------------------------------------|-------------------------------------------------------------------------------------------------------------------------------------------------------------------------------------------------------------------------------------------------------------------------------------------------------------------------------|
| 15 | Eide Bailly, 2013 (21)<br><br>Cooper House<br><br>North Dakota                                  | Chronic Homeless                                                                                                                              | Supportive housing<br>Mental health technician and case management                                                                                                            | E=42    | 1 year before,<br>1 year after     | Pre-post study<br>Administrative data                                                                                                         | Government                                                                        | Jail, shelter, detox, clinic, ED, hospitalization, arrests, administration                                                                                                                 | Pre HF total group cost: \$552,895<br>Post HF total group cost: \$348,755<br><br>Cost decrease of \$204,140                                                                                                                                                                                                                   |
| 16 | Sillanpaa, 2013 (22)<br>Finland                                                                 | Long term homeless, alcohol abuse and mental illness                                                                                          | Supportive housing                                                                                                                                                            | E=15    | 5 months before,<br>5 months after | Pre-post<br>Administrative data                                                                                                               | Government                                                                        | Institutional care, shelters, welfare services for alcohol, police arrests, GP visits, nurse visit, hospitalization, ER, specialized health care visits, ambulance, rents, support service | Pre-HF<br>E= 155,884 euros<br>Post-HF<br>E= 95,987\$<br><br>Net cost savings with HF 59,897euros                                                                                                                                                                                                                              |
| 17 | Mason & Grimbeek, 2013 (23)<br><br>Brisbane, Queensland<br><br>Australia                        | Chronic homelessness, low income, barriers to sustaining housing<br>Have experienced abuse, neglect and dysfunction in their family of origin | Supported and supportive housing                                                                                                                                              | E=7     |                                    | Pre-post<br>Pre HF (12 months)<br>Year 1 support (0-12 months)<br>Post Year 1 Support (12-24 months)<br>Administrative and self-reported data | Government                                                                        | General health, drugs & alcohol, mental health, legal events, case worker, brokerage funds                                                                                                 | Total annual cost decrease over the three periods, from approximately \$15,000 to \$8,500.<br>Cost categories such as general health, mental health and case workers either remained about the same or increased slightly<br>Outcomes support the cost-effectiveness of moving homeless individuals into housing with support |
| 18 | Calgary Homeless Foundation, 2013 (24)<br><br>Calgary, MA<br><br>Canada                         | Homeless with complex needs                                                                                                                   |                                                                                                                                                                               | E = 176 |                                    | Pre-post<br>12 months before, 12 months after<br>Data collection not specified                                                                | Societal<br>Government -subsidized health care, social services and jail services | Hospitalization, ambulance, ER, jails, police, courts, shelter                                                                                                                             | Pre-HF<br>E= \$55,403<br>Post -HF<br>E=\$21,271 including HF costs<br><br>HF net cost savings=\$34,132                                                                                                                                                                                                                        |
| 19 | Massachussets Housing and Shelter Alliance, 2014 (25)<br><br>Massachusetts<br><br>United States | Chronic homeless with disabling condition                                                                                                     | Supported housing (Congregate and scattered site)<br>medical and mental health care, substance abuse treatment, case management, vocational training and life skills training | E=766   | 2 years                            | Pre-post<br>One year before and one year after (2009)<br>Administrative data<br>Self-reported                                                 | Health insurer                                                                    | Medicaid billing claims (in-patient, outpatient, transportation to medical visits, ambulance, pharmacy, dental care)<br>Shelter, incarceration                                             | Pre-HF<br>E=\$ 33 190 per person.<br>Post-HF<br>E=24 072\$<br><br>Cost decrease of \$24,586 offsetting HF intervention cost of \$15,468<br><br>Net cost savings are 9118\$ per person.                                                                                                                                        |

|    |                                                                                                                                                                                                                                                                                |                                                 |                                              |       |                                      |                                                         |                                         |                                                                                                                           |                                                                                      |
|----|--------------------------------------------------------------------------------------------------------------------------------------------------------------------------------------------------------------------------------------------------------------------------------|-------------------------------------------------|----------------------------------------------|-------|--------------------------------------|---------------------------------------------------------|-----------------------------------------|---------------------------------------------------------------------------------------------------------------------------|--------------------------------------------------------------------------------------|
| 20 | Montgomery, 2014 (26)<br>HF Pilot<br>Bedford/Boston, MA<br>Chicago, IL<br>Dallas, TX,<br>Bronx, NY,<br>Detroit, MI<br>Los Angeles<br>Philadelphia, PA<br>New Orleans, LA<br>San Francisco, CA<br>Washington, DC<br>Portland, OR<br>Syracuse, NY<br>Bay Pines, FL<br>Denver, CO | Homeless veterans<br>HUD-VASH clients           | HUD-VASH<br>vouchers +<br>case<br>management | E=700 | 2 years                              | Pre-post<br>One year<br>before HF, one<br>year after HF | Healthcare<br>insurer<br>(HUD-<br>VASH) | In-patient and<br>outpatient costs<br>(mental health,<br>substance abuse,<br>medical)                                     | Total cost pre-HF: 23,472\$<br>Total cost post-HF: 16,041\$<br>Cost savings = \$7431 |
| 21 | Thomas, Shears,<br>Clapsadl Pate, &<br>Priester, 2014 (27)<br><br>Moore County, N.C.<br><br>United States                                                                                                                                                                      | Chronic homeless<br>with disabling<br>condition | Supportive<br>housing                        | E=73  | 1 year<br>before,<br>1 year<br>after | Pre-post                                                | Health<br>system                        | Hospital billing<br>(hospitalization and<br>ED)                                                                           | Pre-HF:<br>E=\$41,542<br><br>Post-HF<br>E=\$12,472<br><br>Cost decrease of \$29,070  |
| 22 | Dunthorn et al.<br>Publication date not<br>available (28)<br><br>Knoxville, Tennessee<br><br>United States                                                                                                                                                                     | Chronic homeless                                | Supportive<br>housing                        | E=41  | 1 year<br>before,<br>1 year<br>after | Pre-post                                                | Government                              | Community costs<br>(case management,<br>shelter, supportive<br>services, jail stays and<br>emergency medical<br>services) | Pre-HF<br>E=\$16,322<br><br>Post-HF<br>E=\$20,676<br>Net cost of HF = \$4354         |

**Online eTable 2 Unpublished studies –HF Impact on costs**

| Study no.                                     | Author                                                                                                                                                   | Population                                | Healthcare | Inpatient psychiatric | Inpatient physical | ED | Justice              | Outpatient clinic                                  | Shelter | Other                                                                                                                                                             | Net impact on overall costs |
|-----------------------------------------------|----------------------------------------------------------------------------------------------------------------------------------------------------------|-------------------------------------------|------------|-----------------------|--------------------|----|----------------------|----------------------------------------------------|---------|-------------------------------------------------------------------------------------------------------------------------------------------------------------------|-----------------------------|
| <b>Unpublished studies - experimental</b>     |                                                                                                                                                          |                                           |            |                       |                    |    |                      |                                                    |         |                                                                                                                                                                   |                             |
| 1                                             | Goering et al., 2014 (1)<br>AH/CS – All sites combined, High needs <sup>1</sup><br><br>The following rows detail study results by sites (3A, 3B, 3C, 3D) | Homeless and mentally ill with high needs |            |                       | -                  |    | Incarceration (-)    | Office visits non-HF (-)<br>Home visits non-HF (-) | -       |                                                                                                                                                                   | +                           |
| 1A                                            | Currie et al., 2014 (2)<br>Vancouver                                                                                                                     | Same as above                             |            | -                     | -                  | -  |                      | Non-study visits (-)                               | -       | SRO (-)<br>Drug and alcohol treatment (-)                                                                                                                         | +                           |
| 1B                                            | Distasio et al., 2014 (3)<br>Winnipeg                                                                                                                    | Same as above<br>More aboriginal          |            | -                     | -                  |    | Incarceration (-)    | Visits non-HF (-)                                  |         | Office visit in community center (-)<br>Transitional housing (-)<br>Drugs or addiction treatment or residential recovery program (-)<br><br>Day center visits (+) | +                           |
| 1C                                            | Stergiopoulos et al., 2014 (4)<br><br>Toronto                                                                                                            | Same as above                             |            | -                     | +                  |    | Court appearance (+) | Office visits non-HF (-)<br>Home visits non-HF (-) | -       |                                                                                                                                                                   | -                           |
| 1D                                            | Latimer et al., (5)<br>Montreal                                                                                                                          | Same as above                             |            | -                     |                    |    | Court appearance (-) | Non-HF office visits (+)                           | -       | Social housing (-)<br>Day centre (+)<br>Psychiatric residential program (+)                                                                                       | +                           |
| 1E                                            | Aubry et al., 2014 (6)<br>Moncton                                                                                                                        | Same as above<br>More rural               |            | -                     | -                  |    |                      | Non-HF office visits (-)                           |         | Detox (-)                                                                                                                                                         | +                           |
| Summary of unpublished studies - experimental | Unpublished studies – experimental: Sites overall results presented in study 1                                                                           |                                           |            |                       |                    |    |                      |                                                    |         |                                                                                                                                                                   |                             |

<sup>1</sup> These reports (1, 1A, 1B, 1C, 1D and 1E) are part of the same AH/CS trial as the studies reported in the article (Stergiopoulos et al. 2015 (study no. 3) and Aubry et al. 2015 (study no. 4).

| Study no.                                                                     | Author                                                       | Population                                                                                                                 | Healthcare                                                        | Inpatient psychiatric         | Inpatient physical | ED | Justice                         | Outpatient clinic | Shelter | Other                                                                      | Net impact on overall costs |
|-------------------------------------------------------------------------------|--------------------------------------------------------------|----------------------------------------------------------------------------------------------------------------------------|-------------------------------------------------------------------|-------------------------------|--------------------|----|---------------------------------|-------------------|---------|----------------------------------------------------------------------------|-----------------------------|
| <b>Unpublished study - quasi-experimental with comparison group</b>           |                                                              |                                                                                                                            |                                                                   |                               |                    |    |                                 |                   |         |                                                                            |                             |
| 2                                                                             | Krisiloff & Boyce, 2012 (7)                                  | Homeless high service users                                                                                                | Medical treatment (-)<br>Mental health treatment (-)              |                               |                    |    | Incarceration (-)               |                   |         | Substance abuse treatment (-)                                              | -                           |
| 3                                                                             | Levanon Seligson et al., 2013 (8)<br><br>(Population A only) | Chronically homeless single adults with SMI or who are dually diagnosed with a mental illness and a substance use disorder | -                                                                 | State psychiatric centers (-) |                    |    | Jails (-)                       |                   | -       | Food stamps (+)<br>Cash assistance (+)                                     | -                           |
| 4                                                                             | Becker, 2015 (9)                                             | Homeless with mental health and addiction problems                                                                         |                                                                   |                               |                    |    |                                 | +                 |         |                                                                            |                             |
| Summary of unpublished studies – quasi-experimental with comparison group (3) |                                                              |                                                                                                                            | 2 -                                                               | 1-                            |                    |    | Incarceration (2 -)             | 1 +               | 1-      | Substance abuse treatment (1-)<br>Food stamps (1+)<br>Cash assistance (1+) | 2-                          |
| <b>Unpublished studies with pre-post design</b>                               |                                                              |                                                                                                                            |                                                                   |                               |                    |    |                                 |                   |         |                                                                            |                             |
| 5                                                                             | Mondello et al., 2007 (11)                                   | Urban homeless, 24% chronic 1 year before and after                                                                        | Physical healthcare (-)<br>Mental healthcare (-)<br>Ambulance (-) |                               |                    | -  | Incarceration (-)<br>Police (-) |                   |         |                                                                            | -                           |
| 6                                                                             | Mondello et al., 2009 (12)                                   | Rural homeless                                                                                                             | Physical healthcare (-)<br>Mental healthcare (-)<br>Ambulance (-) |                               |                    | -  | Incarceration (-)<br>Police (-) |                   |         |                                                                            | -                           |
| 7                                                                             | Hirsch et al. 2008 (13)                                      | Chronic homeless                                                                                                           | Hospital (-)                                                      |                               | -                  | -  | Incarceration (-)               |                   | -       | Substance abuse (-)                                                        | -                           |
| 8                                                                             | United Way of Greater Los Angeles (14)                       | Chronic homeless                                                                                                           | Physical healthcare (-)<br>Mental healthcare (-)                  |                               |                    |    | -                               |                   |         | Substance abuse (-)                                                        | -                           |
| 9                                                                             | Vaughn &                                                     | Chronic                                                                                                                    | ED and inpatient (-)                                              | -                             |                    |    | Incarceration                   | Outpatient        | -       | Substance abuse (-)                                                        | -                           |



| Study no. | Author                                                | Population                                                                                      | Healthcare                                | Inpatient psychiatric | Inpatient physical | ED | Justice                                 | Outpatient clinic                                               | Shelter | Other                                                                  | Net impact on overall costs |
|-----------|-------------------------------------------------------|-------------------------------------------------------------------------------------------------|-------------------------------------------|-----------------------|--------------------|----|-----------------------------------------|-----------------------------------------------------------------|---------|------------------------------------------------------------------------|-----------------------------|
|           | Walsh, 2009 (15)                                      | homeless                                                                                        | Other in-patient psychiatric services (+) |                       |                    |    | (-)                                     | physical (-)<br>Outpatient mental health (+)                    |         | HIV services (-)                                                       |                             |
| 10        | Nogaski et al., 2009 (16)                             | Chronic homeless or at risk with mental illness and/or formerly incarcerated                    |                                           | -                     | -                  | -  |                                         | Outpatient physical (-)<br>Outpatient mental health (-)         |         |                                                                        |                             |
| 11        | The National Center on Family Homelessness, 2009 (17) | Homeless with complex needs including children and families<br>Single adults reported here only |                                           | -                     | +                  |    | Incarceration (-)                       | physical (+)<br>mental health (+)                               |         | Substance abuse (-)<br>Detox (-)<br>Income support (+)                 |                             |
| 12        | Mercer, 2011 (18)                                     | Homeless                                                                                        |                                           | -                     | -                  | -  |                                         |                                                                 |         |                                                                        | -                           |
| 13        | Guerin, 2011 (19)                                     | Homeless with behavioral health disorder                                                        | Hospital (+)<br>Ambulance (-)             |                       | -                  |    | Incarceration (-)                       | Outpatient physical (-)<br>Outpatient mental health (+)         | -       | Substance abuse (-)<br>Detox (-)                                       | -                           |
| 14        | Corry, K. 2012 (20)                                   | Homeless high service users of health and justice services                                      | Ambulance (-)<br>Inpatient(-)             |                       |                    | -  | Police arrest (-)<br>Incarceration (-)  | N/A                                                             |         | N/A                                                                    | -                           |
| 15        | EideBailly, 2013 (21)                                 | Chronically homeless                                                                            | Inpatient (+)                             |                       |                    | -  | Incarceration (-)<br>Police arrests (-) | -                                                               |         | Shelter (-)<br>Detox (-)                                               | -                           |
| 16        | Sillanpaa, 2013 (22)                                  | Long term homeless with mental illness and alcohol abuse                                        | Inpatient (-)<br>Ambulance (-)            |                       |                    | -  | Police arrest (-)                       | GP visits (+)<br>Nurse visits (+)<br>Specialized healthcare (-) |         | Institutional care, shelters, welfare services for alcohol abusers (-) | -                           |
| 17        | Mason & Grimbeek, 2013 (23)                           | Chronic homeless with low income and barriers to sustaining housing                             |                                           |                       |                    | -  | Legal events – justice & police (-)     | Outpatient appointment (+)                                      |         | Substance abuse (-)                                                    | -                           |
| 18        | Calgary Homeless Foundation, 2013 (24)                | Homeless with complex needs                                                                     | Inpatient(-)                              |                       |                    | -  | Police (-)<br>Incarceration (-)         |                                                                 | -       |                                                                        | -                           |
| 19        | Massachussets                                         | Chronic                                                                                         | Medicaid (-)                              |                       |                    |    | Incarceration                           |                                                                 | -       |                                                                        | -                           |

| Study no.                                                | Author                                  | Population                        | Healthcare                                                                                                                                                                                                   | Inpatient psychiatric | Inpatient physical | ED   | Justice                                                       | Outpatient clinic                                                                                                                                        | Shelter | Other                                                                 | Net impact on overall costs |
|----------------------------------------------------------|-----------------------------------------|-----------------------------------|--------------------------------------------------------------------------------------------------------------------------------------------------------------------------------------------------------------|-----------------------|--------------------|------|---------------------------------------------------------------|----------------------------------------------------------------------------------------------------------------------------------------------------------|---------|-----------------------------------------------------------------------|-----------------------------|
|                                                          | Housing and Shelter Alliance, 2014 (25) | homeless with disabling condition |                                                                                                                                                                                                              |                       |                    |      | (-)                                                           |                                                                                                                                                          |         |                                                                       |                             |
| 20                                                       | Montgomery, 2014 (26)                   | Homeless Veterans                 | Mental healthcare (-)<br>Medical healthcare (-)                                                                                                                                                              | -                     |                    |      | N/A                                                           | N/A                                                                                                                                                      |         | Substance abuse (-)<br>Medical +                                      | -                           |
| 21                                                       | Thomas et al., 2014 (27)                | Chronic homeless                  | ED and inpatient (-)                                                                                                                                                                                         |                       |                    |      |                                                               |                                                                                                                                                          |         |                                                                       |                             |
| 22                                                       | Dunthorn et al. (28)                    |                                   | Mental healthcare (-)                                                                                                                                                                                        | -                     |                    |      |                                                               |                                                                                                                                                          |         | Community services (-)                                                |                             |
| Summary of unpublished studies with pre-post design (18) |                                         | Mostly chronic homeless           | Physical healthcare (3-)<br>Mental healthcare (5-)<br>Other inpatient psychiatric services (1+)<br>Inpatient (3-/1+)<br>Medicaid (1-)<br>Hospital (1-/1+)<br>Ambulance (4-)<br>ED and inpatient medical (2-) | 6 -                   | 4- / 1+            | 10 - | Incarceration (10-)<br>Police (6-)<br>Police and justice (1-) | Outpatient physical (3-/1+)<br>Outpatient mental health (1-/3+)<br>Outpatient (1+)<br>GP visits (1+)<br>Nurse visits (1+)<br>Specialized healthcare (1-) | 5-      | Substance abuse (7-)<br>Detox (3-)<br>HIV (1-)<br>Income support (1+) | 14 -                        |

Note :

<sup>1</sup> Complementary data were obtained from the national and site-level At Home/Chez Soi reports. In these reports, only cost differences of \$1,000 or more are indicated. Thus, absent signs mean the cost difference was smaller than that amount. In these reports, multiple imputation was not used to deal with missing data, and no differences were tested statistically.

1. Goering P, Veldhuizen S, Watson A, Adair C, Kopp B, Latimer E, et al. At Home / Chez Soi Final Report. Calgary, AB: Mental Health Commission of Canada; 2014.
2. Currie LB, Moniruzzaman A, Patterson ML, Somers JM. At Home/Chez Soi Project: Vancouver Site Final Report. Calgary (AB): Mental Health Commission of Canada; 2014.
3. Distasio J, Sareen J, Isaak C. Winnipeg Final Report: At Home/Chez Soi Project. Calgary (AB): Mental Health Commission of Canada; 2014.
4. Stergiopoulos V, O'Campo P, Hwang SW, Gozdzik A, Jeyaratnam J, Misir V, et al. At Home/Chez Soi Project: Toronto Site Final Report. Calgary (AB): Mental Health Commission of Canada; 2014.
5. Latimer E, Rabouin D. The At Home/Chez Soi Canadian Study of Housing First for People who are Homeless and Mentally Ill: Study design and baseline data for the Montreal site. World Psychiatric Association; Buenos Aires Argentina; 2011.
6. Aubry T, Bourque J, Volk L, Leblanc S, Nolin D, Jetté J. At Home/Chez Soi Project: Moncton Site Final Report. Calgary (AB): Mental Health Commission of Canada; 2014.
7. Krisiloff FG, Boyce ES. Project 50: A two year demonstration project in Skid Row. In: collaboration M-a, editor. County Welfare Directors Association of California; Long Beach (CA); 2012.
8. Levanon Seligson A, Lim S, Singh T, Laganis E, Stazesky E, Donahue S, et al. New York/New York III Supportive Housing Evaluation: Interim Utilization and Cost Analysis. New York City Department of Health and Mental Hygiene in collaboration with the New York City Human Resources Administration and the New York State Office of Mental Health; 2013.
9. Becker G. Healthcare Utilization Analysis for Housing First Program in Anchorage Alaska. Anchorage (AK): University of Alaska; 2015.
10. Aubry T, Goering P, Veldhuizen S, Adair C, Bourque J, Distasio J, Latimer E, Stergiopoulos V, Somers J, Streiner D, Tsemberis S. A Randomized Controlled Trial in Five Canadian Cities of the Effectiveness of Housing First with Assertive Community Treatment for Persons with Serious Mental Illness and a History of Homelessness. Psychiatr Serv. Forthcoming (accepted 2015 Jun).
11. Mondello M, Gass AB, McLaughlin T, Shore N. Cost of homelessness: Cost analysis of Permanent Supportive Housing. Corporation for Supportive Housing, Maine Housing, Maine Department of Health and Human Services; 2007.
12. Mondello M, McLaughlin T, Bradley J. The Effectiveness of Permanent Supportive Housing in Maine: A Review of Costs associated with the Second Year of Permanent Supportive Housing for Formerly Homeless Adults with Disability. Maine; 2009.
13. Hirsch E, Glasser I, Williams R, D'Addabbo K, Cigna J. Rhode Island's Housing First Program Evaluation; 2008.
14. United Way of Greater Los Angeles. Homeless Cost Study; 2009.
15. Vaughn J, Walsh A. The cost-effectiveness of permanent supportive housing in North Carolina: Service Cost Analysis of Residents of Woodfin and Griffin Apartments in Asheville. Jordan Institute for families UNC-CH School of Social Work; 2009.
16. Nogaski A, Rynell A, Terpstra A, Edwards H. Supportive Housing in Illinois: A wise investment. The Heartland Alliance Mid-America Institute on Poverty; 2009.
17. The National Center on Family Homelessness. The Minnesota Supportive Housing and Managed Care Pilot: Evaluation Summary. Heart Connection; 2009.
18. Mercer Alliance to End Homelessness. Mercer Housing First Demonstration Initiative: Report to the Community. 2011.
19. Guerin P. City of Albuquerque Housing First Cost Study Final Report. University of New Mexico Institute for Social Research; 2011.
20. Corry K. San Diego Housing Commission Partnership: Project 25. San Diego, CA: Housing Innovations Department San Diego Housing Commission; 2012.
21. Eide Bailly. Cooper House Impact Report. North Dakota; 2013.
22. Sillanpaa V. Cost-effects of Housing First: Cost savings in health and judicial budgets achieved through Housing First. Tackling homelessness as a social investment for the future; Amsterdam (Netherlands);2013.
23. Mason C, Grimbeek P. A Housing First approach to homelessness in Brisbane: Sustaining tenancies and the cost effectiveness of support services. Brisbane (Australia); 2013.
24. Calgary Homeless Foundation. The Cost Benefits of Housing First. Calgary (MB); 2013.
25. Massachusetts Housing and Shelter Alliance. Permanent Supportive Housing: A solution-driven model. Boston (MA); 2014.

26. Montgomery E, Hill L, Culhane D, Kane V. Housing First Implementation Brief. In: Affairs USDoV, editor. Philadelphia, PA: VA National Center on Homelessness among Veterans; 2014.
27. Thomas L, Shears JK, Clapsadl Pate M, Priester MA. Moore Place Permanent Supportive Housing Evaluation Study Year 1 Report. Charlotte, NC: University of North Carolina Department of Social Work; 2014.
28. Dunthorn M, Cox K, Brown K, Mastronardi A, Sturm R, Patterson DA, et al. Comparative Costs and Benefits of Permanent Supportive Housing in Knoxville, Tennessee. Knoxville, TN.
